# Supplementary material for: Building Valveless Impedance Pumps From Biological Components: Progress and Challenges
Source: Front Physiol. 2022 Jan 31;12:770906. doi: 10.3389/fphys.2021.770906 (PMC8842681; doi:10.3389/fphys.2021.770906)
Supplement: Supplementary file 1 [file Data_Sheet_1.xlsx]

## Sheet: TABLE 2
	year	first author	ref #	setup	variables tested	provided or estimated from the cited study								calculated based on Eq.1&3						small pumps
						L	ID	h	E	F range	~Fmax	w	Qmax	h/D	c	c'	Fn	Qprst
	NON-BIOLOGICAL					cm	cm	cm	MPa	Hz	Hz	cm	ml/s		m/s	m/s	Hz	ml/s
	2003	Otteson	5	closed	frequency, pincher location, compression ratio	50	2	0.1	0.41	2.5 -3.5	2.9	1	1.2	0.05	4.52769	5.20685	4.52769	9.106
	2005	Hickerson	21	open	frequency, elasticity, pincher size & location, system size, transmural pressure	15	1.91	0.0793	1.19	1-8	4.7	2.54	40	0.0415183	7.029	8.08335	23.43	34.1875
				closed		2	0.19	0.005	0.22	20-142	55	0.24	0.15	0.0263158	2.40613	2.76705	60.1533	0.374068		0.15	0.374068
	2005	Rinderknecht	15	closed	frequency, open vs closed, open loop dimensions	1.96	0.2	0.005	0.4	1-180	55	0.24	0.18	0.025	3.16228	3.63662	80.6703	0.41448		0.18	0.41448
				open		1.2	0.025	0.005	2	82	82	0.04	0.0003	0.2	20	23	833.333	0.00160925		0.0003	0.00160925
	2006	Hickerson	20	closed	frequency, transmural pressure	15	2	0.08	1.19	0-8	4.7	2.5	20	0.04	6.89928	7.93417	22.9976	36.895
	2008	Bringley	23	closed	frequency, pincher location, elastic tube rigditiy	17.4	1.9	0.051	0.99	0.5-6.8	6.8	2.22	60	0.0268421	5.15497	5.92821	14.8131	42.7798
	2009	Wen	14	open	pincher location, symmetry, degree of compression, cross section shape	5	0.6	0.1	2.2	8-40	26	3	9.66667	0.166667	19.1485	22.0208	191.485	22.0428
	2011	Meier	26	closed	resistance, transmural pressure, wall thickness, pincher location, amplitude and offset of excitation	2	0.18	0.005	1	1-140	60	0.28	0.05	0.0277778	5.27046	6.06103	131.762	0.427291		0.05	0.427291
						2	0.15	0.025	13.5	1-140	140	0.28	0.137	0.166667	47.4342	54.5493	1185.85	0.69237		0.137	0.69237
	2013	Lee	19	open	frequency, pincher location	50	2.8	0.2	2.16	4-7	4.5	5	127.333	0.0714286	12.4212	14.2844	12.4212	138.474
	2017	Hiermeier	11	open	frequency, viscosity, straight vs kink, double walled	34.8	0.63	0.013	-	0.5-3	3	1.1	0.5	0.0206349				1.02817		0.5	1.02817
	2020	Manoupolus	22	closed	frequency, cross-sectional area, pincher size & location	100	1.2	0.1	1.96	1-12	9.3	10	83.3333	0.0833333	12.7802	14.6972	6.3901	105.127
	2021	Davtyan	25	closed	frequency, pincher location, viscosity	3.8	0.5	0.1	0.047	0.5-2.5	2.5	0.35	0.04	0.2	3.06594	3.52583	40.3413	0.171719		0.04	0.171719
	BIOLOGICAL
	2006	Forouhar	9	closed	frequency	0.02	0.006	0.002	0.002	1.6-3	2.3	0.002	1e-06	0.333333	0.816497	0.938971	2041.24	1.29996e-07		1e-06	1.29996e-07
	2013	Azizgolshani	66	closed	frequency, degree of cell seeding	5	0.4	0.01	0.4	1-4	1.5	0.75	1.2e-05	0.025	3.16228	3.63662	31.6228	0.1413		1.2e-05	0.1413
	2019	Li	27	closed	frequency, stimulation voltage, buckle vs unbuckle	3	0.428	0.0275	0.01	1-4	4	0.15	0.0002	0.0642523	0.801576	0.921812	13.3596	0.0862797		0.0002	0.0862797
					all pump values (column Q vs M)							data for small pumps (column V vs U)

## Sheet: Eq.1 Fn
Equation 1		Natural frequency calculation
	Formula:		Fn = pulse wave velocity/ 2* tube length = c/2L
	Calculations:
			symbol	value	units
		velocity	c	5	m/s
		tube length	L	35	cm
			Fn	7.14286	Hz

## Sheet: Eq.2&3 Pulse wave velocity
Equation 2		Pulse wave velocity							Equation 3		Pulse wave velocity for thick tubes
	Formula:	c = (E*h / ρ*D)1/2								Formula:	c’ = (E*h / ρ*D*(1- υ2))1/2
	Calculations:									Calculations:
		symbol	value	units	converted to SI units						symbol	value	units	converted to SI units
	Young modulus	E	0.41	MPa	410000	Pa				Young modulus	E	0.41	MPa	410000	Pa
	wall thickness	h	0.1	cm	0.001	m				wall thickness	h	0.1	cm	0.001	m
	fluid density	ρ	1	g/cm3	1000	kg/m3				fluid density	ρ	1	g/cm3	1000	kg/m3
	tube inner diameter	D	2	cm	0.02	m				tube inner diameter	D	2	cm	0.02	m
				c	4.52769	m/s				Poisson ratio	υ	0.5	-	0.5
													c’	5.22813	m/s

## Sheet: Eq.4 Q peristaltic
Equation 4		Flow estimate for peristaltic pump of the same dimensions and compression frequencies
	Formula:		Qperistaltic = displaced volume * frequency = w*πR2*F
	Calculations:
			symbol	value	units
		pincher width	w	1	cm
		pi	π	3.14
		tube radius	R	1	cm
		max frequency	Fmax	2.9	Hz
		Qperistaltic	Qp	9.106	ml/s
NOTE: Max frequency here is the empirical frequency of Liebau pump at which the maximal flow was observed in each specific study

## Sheet: Eq.5 Womersley number
Equation 5	Womersley number calculations
	Formula:	Wo = R (ρ ω /µ)1/2
	Calculations:
		symbol	value	units	converted to SI units
	tube radius	R	0.33	cm	0.0033	m
	frequency	F	3	Hz	3	1/s
	angular frequency (2πf)	ω	18.84	Rad/s	18.84
	fluid density	ρ	1	g/cm3	1000	kg/m3
	dynamic viscosity	µ	0.00089	Pa·s	0.00089
			Womersley number	Wo	15.1831

## Sheet: Eq.6 Kw coefficient
Equation 6		Flowrate calculation based on linear velocity of midstream particles									Calculation of Kw based on empirical formula by Ponzini et al, 2010
		Formula:	Q = πR2 . Kw v							Formula:
		Calculations:
			pi	π	3.14	-
			tube inner radius	R	1	cm				Calculations:
			Wo coefficient	Kw	0.6	-
			linear velocity	v	2	cm/s				Wo ranges	Wo		Kw
										Wo<2.7	2	g1	0.516142
			flowrate	Q	3.768	ml/s				2.7<Wo<3.1	3	wg1+(1-w)g2	0.582406
										3.1<Wo<15	6	g2	0.667678
										a1	0.00417
										a2	1.00241
										b1	2.95272
										b2	0.94973
										w	0.276453
